# Supplementary material for: COVID-19 Vaccination Coverage among 42,565 Adults Amid the Spread of Omicron Variant in Beijing, China
Source: MDPI journal article supplement (doi:10.3390/vaccines11040739), 2023-03-27
Supplement: s1 [file s1]

**Table S1. COVID-19 vaccination coverage rates stratified by dose among people aged 18-59 years old.**

| Characteristics    | ≥1 dose          |               |         | ≥2 doses         |               |         | ≥3 doses         |               |         | 4 doses        |               |         |
|--------------------|------------------|---------------|---------|------------------|---------------|---------|------------------|---------------|---------|----------------|---------------|---------|
|                    | n (%)            | 95% CI        | P value | n (%)            | 95% CI        | P value | n (%)            | 95% CI        | P value | n (%)          | 95% CI        | P value |
| <b>Total</b>       | 28,686<br>(95.5) | 95.3-<br>95.7 |         | 28,333<br>(94.3) | 94.1-<br>94.6 |         | 26,574<br>(88.5) | 88.1-<br>88.8 |         | 5050<br>(16.8) | 16.4-<br>17.2 |         |
| <b>Age (years)</b> |                  |               | <0.001  |                  |               | <0.001  |                  |               | <0.001  |                |               | <0.001  |
| 18-29              | 4029 (96.9)      | 96.3-<br>97.4 |         | 3985 (95.8)      | 95.2-<br>96.4 |         | 3627 (87.2)      | 86.2-<br>88.2 |         | 732 (17.6)     | 16.5-<br>18.8 |         |
| 30-39              | 9103 (95.7)      | 95.3-<br>96.1 |         | 8972 (94.3)      | 93.8-<br>94.8 |         | 8304 (87.3)      | 86.6-<br>87.9 |         | 1818<br>(19.1) | 18.3-<br>19.9 |         |
| 40-49              | 7926 (96.4)      | 95.9-<br>96.7 |         | 7839 (95.3)      | 94.8-<br>95.7 |         | 7470 (90.8)      | 90.2-<br>91.4 |         | 1510<br>(18.4) | 17.5-<br>19.2 |         |
| 50-59              | 7628 (93.7)      | 93.2-<br>94.3 |         | 7537 (92.6)      | 92.0-<br>93.2 |         | 7173 (88.2)      | 87.4-<br>88.8 |         | 990 (12.2)     | 11.5-<br>12.9 |         |
| <b>Gender</b>      |                  |               | 0.175   |                  |               | 0.06    |                  |               | 0.003   |                |               | <0.001  |
| Male               | 8987 (95.7)      | 95.3-<br>96.1 |         | 8889 (94.7)      | 94.2-<br>95.1 |         | 8381 (89.3)      | 88.7-<br>89.9 |         | 1415<br>(15.1) | 14.4-<br>15.8 |         |
| Female             | 19,699<br>(95.4) | 95.1-<br>95.7 |         | 19,444<br>(94.2) | 93.8-<br>94.5 |         | 18,193<br>(88.1) | 87.7-<br>88.5 |         | 3635<br>(17.6) | 17.1-<br>18.1 |         |
| <b>Location</b>    |                  |               | 0.101   |                  |               | 0.005   |                  |               | <0.001  |                |               | 0.699   |
| Urban              | 20,612<br>(95.4) | 95.1-<br>95.7 |         | 20,334<br>(94.1) | 93.8-<br>94.4 |         | 18,958<br>(87.7) | 87.3-<br>88.2 |         | 3622<br>(16.8) | 16.3-<br>17.3 |         |
| Rural              | 8074 (95.8)      | 95.4-<br>96.2 |         | 7999 (94.9)      | 94.4-<br>95.4 |         | 7616 (90.4)      | 89.7-<br>91.0 |         | 1428<br>(16.9) | 16.2-<br>17.8 |         |
| <b>Education</b>   |                  |               | <0.001  |                  |               | <0.001  |                  |               | <0.001  |                |               | <0.001  |

|                                                          |               |           |                  |           |                  |           |                  |                  |
|----------------------------------------------------------|---------------|-----------|------------------|-----------|------------------|-----------|------------------|------------------|
| Junior high school and below                             | 3694 (93.9)   | 93.1-94.6 | 3650 (92.8)      | 91.9-93.5 | 3458 (87.9)      | 86.8-88.9 | 296 (7.5)        | 6.7-8.4          |
| High school and technical secondary school               | 4896 (94.6)   | 93.9-95.2 | 4833 (93.4)      | 92.7-94.0 | 4556 (88.0)      | 87.1-88.9 | 588 (11.4)       | 10.5-12.2        |
| Bachelor degree                                          | 18,072 (96.2) | 95.9-96.5 | 17,859 (95.1)    | 94.7-95.4 | 16,772 (89.3)    | 88.8-89.7 | 3914 (20.8)      | 20.3-21.4        |
| Master degree or above                                   | 2024 (94.7)   | 93.7-95.6 | 1991 (93.2)      | 92.0-94.2 | 1788 (83.7)      | 82.1-85.2 | 252 (11.8)       | 10.5-13.2        |
| <b>Health insurance</b>                                  |               |           | <b>0.006</b>     |           | <b>0.009</b>     |           | <b>&lt;0.001</b> | <b>&lt;0.001</b> |
| Medical insurance for urban employees and residents      | 24,407 (95.7) | 95.4-95.9 | 24,107 (94.5)    | 94.2-94.8 | 22,669 (88.8)    | 88.5-89.2 | 4669 (18.3)      | 17.8-18.8        |
| New rural cooperative medical insurance                  | 2717 (94.9)   | 94.0-95.6 | 2688 (93.9)      | 92.9-94.7 | 2546 (88.9)      | 87.7-90.0 | 219 (7.6)        | 6.7-8.7          |
| Others                                                   | 1562 (94.3)   | 93.1-95.3 | 1538 (92.8)      | 91.5-94.0 | 1359 (82.0)      | 80.1-83.8 | 162 (9.8)        | 8.4-11.3         |
| <b>Occupation</b>                                        |               |           | <b>&lt;0.001</b> |           | <b>&lt;0.001</b> |           | <b>&lt;0.001</b> | <b>&lt;0.001</b> |
| Service Industry personnel                               | 3082 (96.5)   | 95.8-97.1 | 3050 (95.5)      | 94.7-96.2 | 2860 (89.5)      | 88.4-90.6 | 337 (10.6)       | 9.5-11.7         |
| Health care workers                                      | 10,069 (97.6) | 97.2-97.8 | 9957 (96.5)      | 96.1-96.8 | 9546 (92.5)      | 92.0-93.0 | 3002 (29.1)      | 28.2-30.0        |
| Civil servants and employees of enterprises/institutions | 5070 (95.3)   | 94.7-95.8 | 5007 (94.1)      | 93.4-94.7 | 4662 (87.6)      | 86.7-88.5 | 739 (13.9)       | 13.0-14.8        |
| Pleasant                                                 | 1736 (94.8)   | 93.7-95.8 | 1717 (93.8)      | 92.6-94.8 | 1645 (89.8)      | 88.4-91.2 | 146 (8.0)        | 6.8-9.3          |
| Retired                                                  | 1683 (90.5)   | 89.1-91.8 | 1657 (89.1)      | 87.6-90.4 | 1529 (82.2)      | 80.4-83.9 | 82 (4.4)         | 3.5-5.4          |

|                        |                  |               |                  |               |                  |               |                  |                  |
|------------------------|------------------|---------------|------------------|---------------|------------------|---------------|------------------|------------------|
| Unemployed/freelance   | 1667 (89.7)      | 88.2-<br>91.0 | 1642 (88.3)      | 86.8-<br>89.7 | 1462 (78.6)      | 76.7-<br>80.5 | 81 (4.4)         | 3.5-5.4          |
| Others                 | 5379 (95.2)      | 94.7-<br>95.8 | 5303 (93.9)      | 93.2-<br>94.5 | 4870 (86.2)      | 85.3-<br>87.1 | 663 (11.7)       | 10.9-<br>12.6    |
| <b>Chronic disease</b> |                  |               | <b>&lt;0.001</b> |               | <b>&lt;0.001</b> |               | <b>&lt;0.001</b> | <b>&lt;0.001</b> |
| No                     | 18,894<br>(96.7) | 96.5-<br>97.0 | 18,687<br>(95.7) | 95.4-<br>96.0 | 17,470<br>(89.5) | 89.0-<br>89.9 | 3471<br>(17.8)   | 17.2-<br>18.3    |
| Yes                    | 9792 (93.2)      | 92.7-<br>93.7 | 9646 (91.8)      | 91.3-<br>92.3 | 9104 (86.7)      | 86.0-<br>87.3 | 1579<br>(15.0)   | 14.4-<br>15.7    |

Statistically significant p-values are bold. Notably, the coverage rate of 4 doses only refers to the proportion of people who have received a total of four doses of COVID-19 vaccines in the whole population.

CI: confidence interval

**Table S2. Demographic determinants associated with the COVID-19 vaccination coverage rates among people aged 18-59 years old.**

| Characteristics                            | ≥1 dose          |              | ≥2 doses         |         | ≥3 doses         |         | 4 doses          |              |
|--------------------------------------------|------------------|--------------|------------------|---------|------------------|---------|------------------|--------------|
|                                            | aOR (95% CI)     | p value      | aOR (95% CI)     | p value | aOR (95% CI)     | p value | aOR (95% CI)     | p value      |
| <b>Age (years)</b>                         |                  |              |                  |         |                  |         |                  |              |
| 18-29                                      | 0.96 (0.75-1.21) | 0.705        | 0.91 (0.73-1.12) | 0.354   | 0.55 (0.47-0.63) | <0.001  | 0.75 (0.66-0.84) | <0.001       |
| 30-39                                      | 0.79 (0.67-0.95) | <b>0.01</b>  | 0.75 (0.64-0.88) | <0.001  | 0.60 (0.53-0.67) | <0.001  | 0.92 (0.83-1.02) | 0.106        |
| 40-49                                      | 1.23 (1.04-1.46) | <b>0.018</b> | 1.16 (0.99-1.35) | 0.059   | 1.02 (0.91-1.15) | 0.743   | 1.06 (0.96-1.17) | 0.232        |
| 50-59                                      | Reference        |              | Reference        |         | Reference        |         | Reference        |              |
| <b>Gender</b>                              |                  |              |                  |         |                  |         |                  |              |
| Male                                       | 1.25 (1.10-1.41) | <b>0.001</b> | 1.25 (1.12-1.40) | <0.001  | 1.26 (1.16-1.37) | <0.001  | 1.00 (0.93-1.08) | 0.995        |
| Female                                     | Reference        |              | Reference        |         | Reference        |         | Reference        |              |
| <b>Location</b>                            |                  |              |                  |         |                  |         |                  |              |
| Urban                                      | Reference        |              | Reference        |         | Reference        |         | Reference        |              |
| Rural                                      | 1.33 (1.14-1.54) | <0.001       | 1.38 (1.21-1.58) | <0.001  | 1.45 (1.31-1.60) | <0.001  | 1.57 (1.46-1.70) | <0.001       |
| <b>Education</b>                           |                  |              |                  |         |                  |         |                  |              |
| Junior high school and below               | Reference        |              | Reference        |         | Reference        |         | Reference        |              |
| High school and technical secondary school | 1.07 (0.88-1.29) | 0.498        | 1.06 (0.89-1.27) | 0.487   | 1.06 (0.93-1.22) | 0.38    | 1.25 (1.07-1.47) | <b>0.005</b> |
| Bachelor degree                            | 1.10 (0.90-1.34) | 0.369        | 1.12 (0.93-1.34) | 0.226   | 1.02 (0.88-1.17) | 0.829   | 1.50 (1.28-1.76) | <0.001       |
| Master degree or above                     | 0.81 (0.61-1.08) | 0.144        | 0.83 (0.65-1.08) | 0.16    | 0.69 (0.57-0.83) | <0.001  | 0.89 (0.72-1.10) | 0.288        |
| <b>Health insurance</b>                    |                  |              |                  |         |                  |         |                  |              |

|                                                          |                  |                  |                  |                  |                  |                  |                  |                  |
|----------------------------------------------------------|------------------|------------------|------------------|------------------|------------------|------------------|------------------|------------------|
| Medical insurance for urban employees and residents      | Reference        |                  | Reference        |                  | Reference        |                  | Reference        |                  |
| New rural cooperative medical insurance                  | 1.18 (0.94-1.49) | 0.163            | 1.15 (0.93-1.42) | 0.198            | 1.04 (0.88-1.22) | 0.661            | 0.67 (0.56-0.80) | <b>&lt;0.001</b> |
| Others                                                   | 0.89 (0.71-1.12) | 0.326            | 0.88 (0.72-1.08) | 0.229            | 0.71 (0.62-0.82) | <b>&lt;0.001</b> | 0.70 (0.59-0.83) | <b>&lt;0.001</b> |
| <b>Occupation</b>                                        |                  |                  |                  |                  |                  |                  |                  |                  |
| Service Industry personnel                               | Reference        |                  | Reference        |                  | Reference        |                  | Reference        |                  |
| Health care workers                                      | 1.57 (1.24-2.00) | <b>&lt;0.001</b> | 1.40 (1.14-1.73) | <b>0.002</b>     | 1.79 (1.55-2.07) | <b>&lt;0.001</b> | 3.33 (2.92-3.80) | <b>&lt;0.001</b> |
| Civil servants and employees of enterprises/institutions | 0.80 (0.63-1.01) | 0.063            | 0.82 (0.66-1.01) | 0.066            | 1.01 (0.87-1.17) | 0.904            | 1.38 (1.20-1.60) | <b>&lt;0.001</b> |
| Pleasant                                                 | 0.61 (0.45-0.84) | <b>0.002</b>     | 0.63 (0.48-0.84) | <b>0.002</b>     | 0.77 (0.62-0.96) | <b>0.019</b>     | 0.81 (0.64-1.01) | 0.063            |
| Retired                                                  | 0.50 (0.38-0.65) | <b>&lt;0.001</b> | 0.53 (0.41-0.68) | <b>&lt;0.001</b> | 0.57 (0.47-0.68) | <b>&lt;0.001</b> | 0.41 (0.31-0.53) | <b>&lt;0.001</b> |
| Unemployed/freelance                                     | 0.31 (0.25-0.40) | <b>&lt;0.001</b> | 0.36 (0.29-0.44) | <b>&lt;0.001</b> | 0.43 (0.37-0.51) | <b>&lt;0.001</b> | 0.41 (0.32-0.52) | <b>&lt;0.001</b> |
| Others                                                   | 0.71 (0.57-0.90) | <b>0.004</b>     | 0.72 (0.58-0.88) | <b>0.001</b>     | 0.79 (0.68-0.90) | <b>0.001</b>     | 1.08 (0.94-1.25) | 0.281            |
| <b>Chronic disease</b>                                   |                  |                  |                  |                  |                  |                  |                  |                  |
| No                                                       | 2.14 (1.89-2.43) | <b>&lt;0.001</b> | 2.03 (1.81-2.27) | <b>&lt;0.001</b> | 1.56 (1.44-1.70) | <b>&lt;0.001</b> | 1.05 (0.98-1.14) | 0.182            |
| Yes                                                      | Reference        |                  | Reference        |                  | Reference        |                  | Reference        |                  |

Statistically significant p-values are bold. Notably, the coverage rate of 4 doses only refers to the proportion of people who have received a total of four doses of COVID-19 vaccines in the whole population.

aOR: adjusted odds ratio; CI: confidence interval

**Table S3. Sensitivity analysis to explore demographic determinants associated with the COVID-19 vaccination coverage among all population.**

| Characteristics                                     | ≥1 dose          |         | ≥2 doses         |         | ≥3 doses         |         | 4 doses          |         |
|-----------------------------------------------------|------------------|---------|------------------|---------|------------------|---------|------------------|---------|
|                                                     | aOR (95% CI)     | p value |
| <b>Age (years)</b>                                  |                  |         |                  |         |                  |         |                  |         |
|                                                     | 0.98 (0.97-0.98) | <0.001  | 0.97 (0.97-0.98) | <0.001  | 0.99 (0.98-0.99) | <0.001  | 1.00 (1.00-1.00) | 0.414   |
| <b>Gender</b>                                       |                  |         |                  |         |                  |         |                  |         |
| Male                                                | 1.19 (1.10-1.29) | <0.001  | 1.16 (1.08-1.25) | <0.001  | 1.14 (1.08-1.21) | <0.001  | 1.02 (0.95-1.09) | 0.611   |
| Female                                              | Reference        |         | Reference        |         | Reference        |         | Reference        |         |
| <b>Location</b>                                     |                  |         |                  |         |                  |         |                  |         |
| Urban                                               | Reference        |         | Reference        |         | Reference        |         | Reference        |         |
| Rural                                               | 1.39 (1.24-1.55) | <0.001  | 1.43 (1.30-1.58) | <0.001  | 1.40 (1.30-1.51) | <0.001  | 1.60 (1.48-1.72) | <0.001  |
| <b>Education</b>                                    |                  |         |                  |         |                  |         |                  |         |
| Junior high school and below                        | Reference        |         | Reference        |         | Reference        |         | Reference        |         |
| High school and technical secondary school          | 1.34 (1.20-1.49) | <0.001  | 1.46 (1.32-1.61) | <0.001  | 1.45 (1.34-1.57) | <0.001  | 1.48 (1.30-1.68) | <0.001  |
| Bachelor degree                                     | 1.21 (1.07-1.36) | 0.002   | 1.32 (1.18-1.47) | <0.001  | 1.26 (1.15-1.37) | <0.001  | 1.86 (1.62-2.14) | <0.001  |
| Master degree or above                              | 0.91 (0.73-1.14) | 0.406   | 0.97 (0.79-1.18) | 0.757   | 0.82 (0.71-0.95) | 0.009   | 1.16 (0.96-1.41) | 0.122   |
| <b>Health insurance</b>                             |                  |         |                  |         |                  |         |                  |         |
| Medical insurance for urban employees and residents | Reference        |         | Reference        |         | Reference        |         | Reference        |         |
| New rural cooperative medical insurance             | 1.38 (1.18-1.60) | <0.001  | 1.42 (1.24-1.63) | <0.001  | 1.17 (1.05-1.30) | 0.004   | 0.70 (0.60-0.81) | <0.001  |
| Others                                              | 0.97 (0.83-1.13) | 0.679   | 1.00 (0.87-1.15) | 0.992   | 0.84 (0.76-0.93) | 0.001   | 0.72 (0.62-0.84) | <0.001  |
| <b>Occupation</b>                                   |                  |         |                  |         |                  |         |                  |         |

|                                                          |                  |                  |                  |                  |                  |                  |                  |                  |
|----------------------------------------------------------|------------------|------------------|------------------|------------------|------------------|------------------|------------------|------------------|
| Service Industry personnel                               | Reference        |                  | Reference        |                  | Reference        |                  | Reference        |                  |
| Health care workers                                      | 1.59 (1.29-1.96) | <b>&lt;0.001</b> | 1.32 (1.09-1.59) | <b>0.004</b>     | 1.57 (1.37-1.79) | <b>&lt;0.001</b> | 3.02 (2.67-3.42) | <b>&lt;0.001</b> |
| Civil servants and employees of enterprises/institutions | 0.85 (0.69-1.04) | 0.12             | 0.83 (0.69-1.00) | 0.052            | 0.97 (0.85-1.11) | 0.68             | 1.26 (1.10-1.45) | <b>0.001</b>     |
| Pleasant                                                 | 0.81 (0.65-1.02) | 0.074            | 0.75 (0.61-0.93) | <b>0.007</b>     | 0.81 (0.70-0.95) | <b>0.008</b>     | 0.70 (0.57-0.85) | <b>&lt;0.001</b> |
| Retired                                                  | 0.73 (0.60-0.88) | <b>0.001</b>     | 0.77 (0.65-0.91) | <b>0.002</b>     | 0.70 (0.62-0.79) | <b>&lt;0.001</b> | 0.35 (0.29-0.41) | <b>&lt;0.001</b> |
| Unemployed/freelance                                     | 0.40 (0.33-0.50) | <b>&lt;0.001</b> | 0.40 (0.33-0.49) | <b>&lt;0.001</b> | 0.46 (0.40-0.53) | <b>&lt;0.001</b> | 0.39 (0.30-0.49) | <b>&lt;0.001</b> |
| Others                                                   | 0.69 (0.57-0.83) | <b>&lt;0.001</b> | 0.61 (0.52-0.73) | <b>&lt;0.001</b> | 0.67 (0.59-0.76) | <b>&lt;0.001</b> | 0.97 (0.85-1.11) | 0.663            |
| <b>Chronic disease</b>                                   |                  |                  |                  |                  |                  |                  |                  |                  |
| No                                                       | 1.73 (1.56-1.91) | <b>&lt;0.001</b> | 1.55 (1.42-1.69) | <b>&lt;0.001</b> | 1.32 (1.24-1.41) | <b>&lt;0.001</b> | 1.05 (0.98-1.13) | 0.188            |
| Yes                                                      | Reference        |                  | Reference        |                  | Reference        |                  | Reference        |                  |

---

Statistically significant p-values are bold. Notably, the coverage rate of 4 doses only refers to the proportion of people who have received a total of four doses of COVID-19 vaccines in the whole population.

aOR: adjusted odds ratio; CI: confidence interval
